# Supplementary material for: Fully solution-induced high performance indium oxide thin film transistors with ZrOx high-k gate dielectrics
Source: Royal Society of Chemistry journal article supplement (doi:10.1039/c8ra02108b), 2018-01-01
Supplement: c8ra02108b1.pdf [file c8ra02108b1.pdf]

## Supporting Information

Fully Solution-Induced Ultralow Voltage High Performance Indium Oxide Thin

Film Transistors With  $ZrO_x$  High-k Gate Dielectrics

Li Zhu,<sup>†</sup> Gang He,<sup>\*,†</sup> Jianguo Lv,<sup>‡</sup> Elvira Fortunato,<sup>§</sup> and Rodrigo Martins<sup>§</sup>

<sup>†</sup>*School of Physics and Materials Science, Radiation Detection Materials & Devices Lab, Anhui University, Hefei 230039, P.R. China*

<sup>‡</sup>*Department of Physics and Electronic Engineering, Hefei Normal University, Hefei 230061, P.R. China*

<sup>§</sup>*Department of Materials Science/CENIMAT-I3N, Faculty of Sciences and Technology, New University of Lisbon and CEMOP-UNINOVA, Campus de Caparica, 2829-516 Caparica, Portugal*

E-mail: [hegang@ahu.edu.cn](mailto:hegang@ahu.edu.cn)

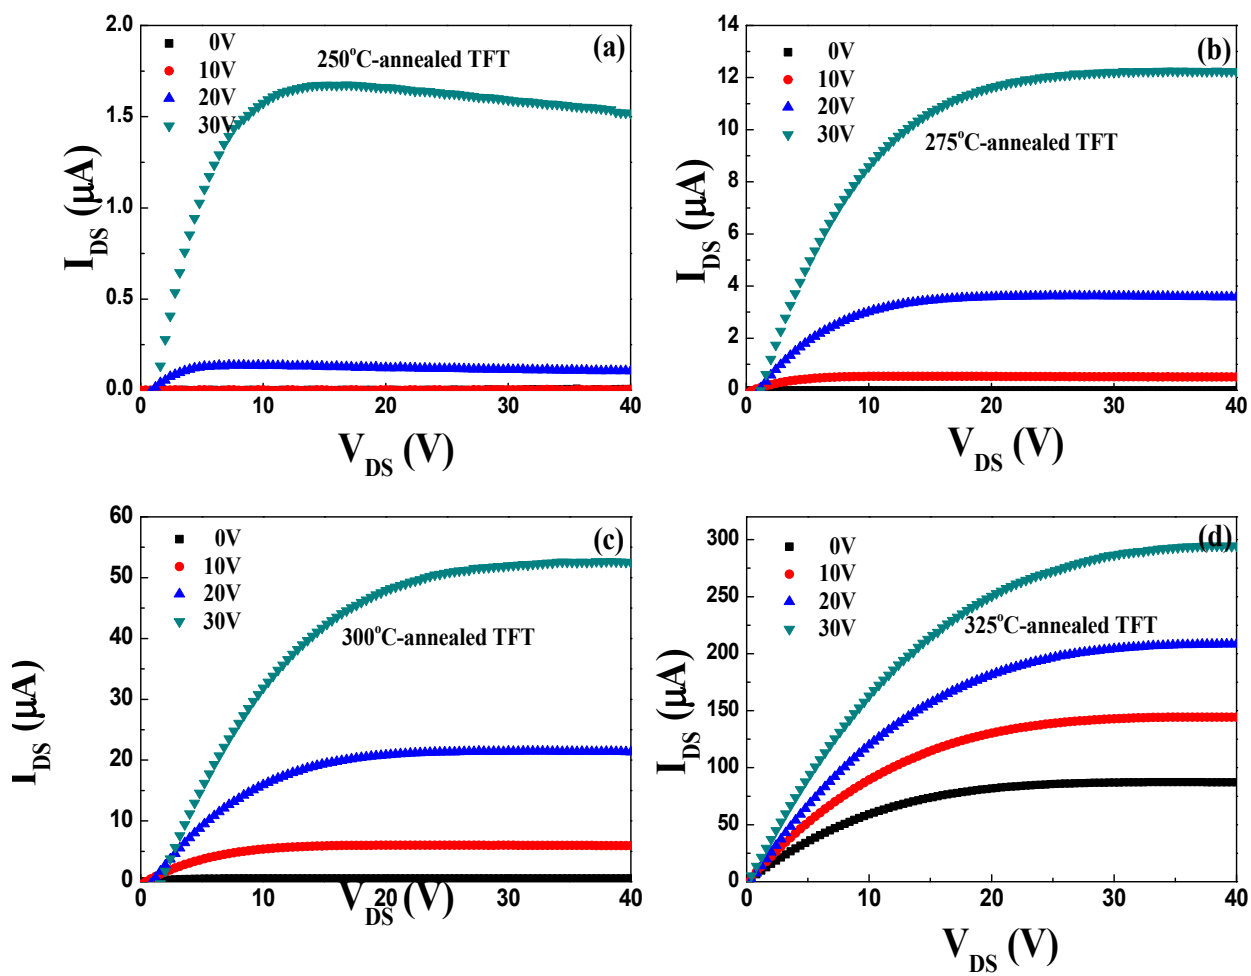

**Figure S1.** The output characteristics of the (a) 250°C-annealed  $\text{In}_2\text{O}_3/\text{SiO}_2$  TFTs, (b) 275°C-annealed  $\text{In}_2\text{O}_3/\text{SiO}_2$  TFTs, (c) 300°C-annealed  $\text{In}_2\text{O}_3/\text{SiO}_2$  TFTs, (d) 325°C-annealed  $\text{In}_2\text{O}_3/\text{SiO}_2$  TFTs.

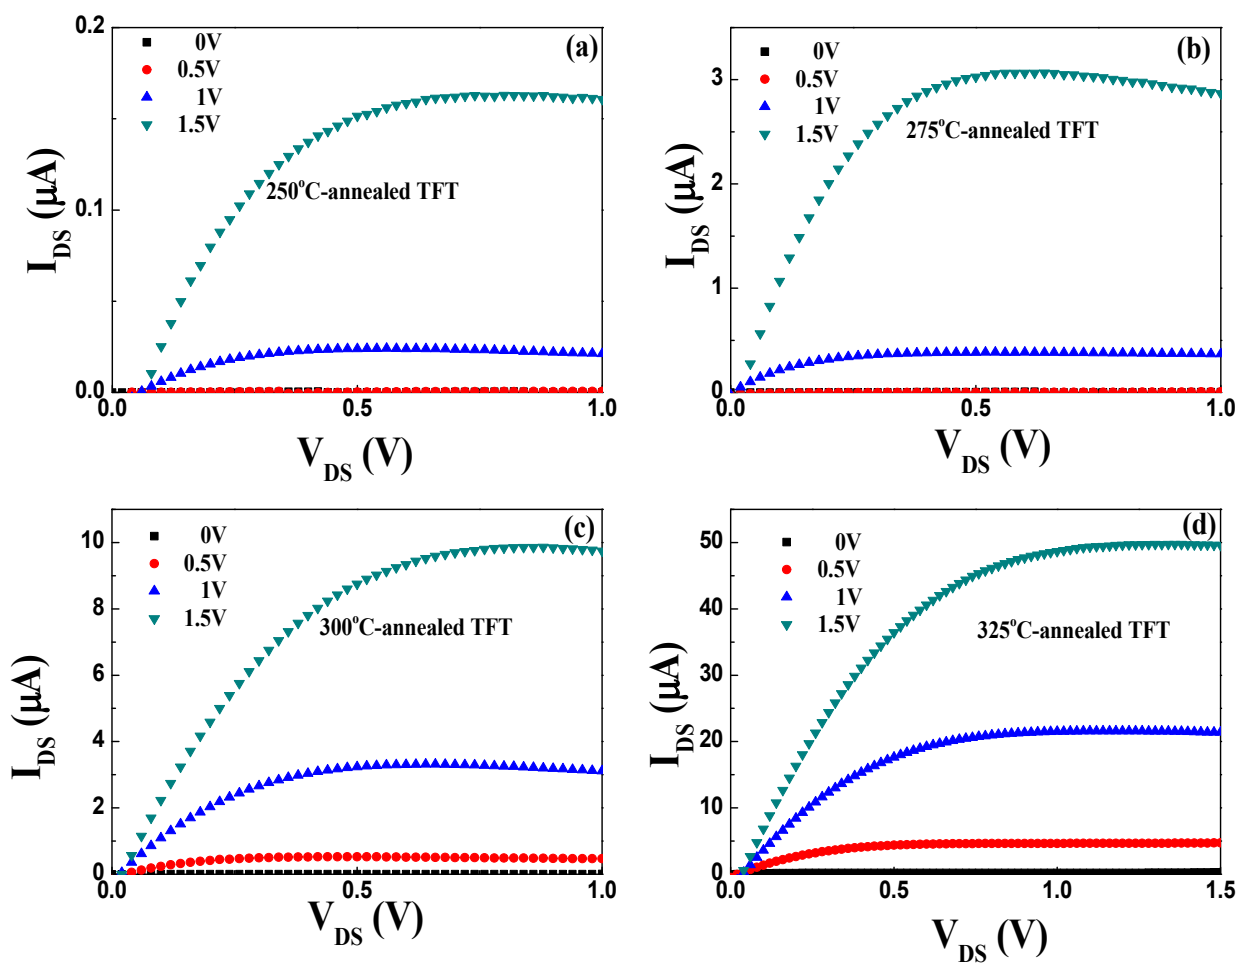

**Figure S2.** The output characteristics of the (a) 250°C-annealed  $\text{In}_2\text{O}_3/\text{ZrO}_x$  TFTs, (b) 275°C-annealed  $\text{In}_2\text{O}_3/\text{ZrO}_x$  TFTs, (c) 300°C-annealed  $\text{In}_2\text{O}_3/\text{ZrO}_x$  TFTs, (d) 325°C-annealed  $\text{In}_2\text{O}_3/\text{ZrO}_x$  TFTs.
